# Supplementary material
Source: PubMed Central journal article supplement (PMC6790771)
Supplement: rspb20191244supp4.pdf [file rspb20191244supp4.pdf]

Table S-1: Goodness of fit test based on the residual sum of squares (RSS). The P-value corresponds the null hypothesis that, for given estimated parameters  $\frac{RSS}{\sigma^2} \sim \chi_{df}^2$ .

|                   | Bintje    | BP3<br>Möwe | Désirée   | Bintje    | BP6<br>Möwe  | Désirée   |
|-------------------|-----------|-------------|-----------|-----------|--------------|-----------|
| Lesion model      |           |             |           |           |              |           |
| RSS               | 3678152   | 4451584     | 2672717   | 1283997   | 1363795      | 2206778   |
| $df = n - 2$      | 125       | 97          | 102       | 137       | 102          | 123       |
| P-value           | 0.46      | 0.45        | 0.45      | 0.48      | 0.48         | 0.44      |
| Sporulation model |           |             |           |           |              |           |
| RSS               | 3.985e+12 | 3.001e+12   | 1.257e+12 | 1.384e+12 | 2.530076e+12 | 6.063e+11 |
| $df = n - 3$      | 124       | 96          | 101       | 136       | 101          | 122       |
| P-value           | 0.43      | 0.41        | 0.41      | 0.48      | 0.41         | 0.39      |
