# Supplementary material
Source: PubMed Central journal article supplement (PMC6790771)
Supplement: rspb20191244supp5.pdf [file rspb20191244supp5.pdf]

Table S-2: Comparison of models between isolates BP3 & BP6 for each cultivar. Calculated F-values higher than the critical value, F(significance level, degree of freedom of numerator, degree of freedom of denominator) indicate that the processes tested contribute to significant differences between the compared treatments. Separate-curve fits are compared with the single-curve fit.

| Models                             | RSS                   | df  | F-value |                     |
|------------------------------------|-----------------------|-----|---------|---------------------|
| <i>Bintje - BP3 against BP6</i>    |                       |     |         |                     |
| <i>Growth model</i>                |                       |     |         |                     |
| Common model                       | 5995779               | 264 |         |                     |
| Separate models                    | 4962149               | 262 |         |                     |
| $\rho$ varying and $t_0$ fixed     | 4909717               | 263 | 57.3    | $> F(0.05, 1, 262)$ |
| $t_0$ varying and $\rho$ fixed     | 5517243               | 263 | 25.3    | $> F(0.05, 1, 262)$ |
| <i>Sporulation model</i>           |                       |     |         |                     |
| Common model                       | $6.88 \times 10^{12}$ | 263 |         |                     |
| Separate models                    | $5.37 \times 10^{12}$ | 260 |         |                     |
| $t_1$ varying, $s$ and $\mu$ fixed | $5.95 \times 10^{12}$ | 262 | 44.9    | $> F(0.05, 1, 260)$ |
| $s$ varying, $t_1$ and $\mu$ fixed | $5.37 \times 10^{12}$ | 262 | 73.2    | $> F(0.05, 1, 260)$ |
| $\mu$ varying, $t_1$ and $s$ fixed | $6.43 \times 10^{12}$ | 262 | 21.9    | $> F(0.05, 1, 260)$ |
| <i>Möwe - BP3 against BP6</i>      |                       |     |         |                     |
| <i>Growth model</i>                |                       |     |         |                     |
| Common model                       | 7165602               | 201 |         |                     |
| Separate models                    | 5815379               | 199 |         |                     |
| $\rho$ varying and $t_0$ fixed     | 5753928               | 200 | 48.3    | $> F(0.05, 1, 199)$ |
| $t_0$ varying and $\rho$ fixed     | 6818536               | 200 | 11.9    | $> F(0.05, 1, 199)$ |
| <i>Sporulation model</i>           |                       |     |         |                     |
| Common model                       | $6.68 \times 10^{12}$ | 200 |         |                     |
| Separate models                    | $5.53 \times 10^{12}$ | 197 |         |                     |
| $t_1$ varying, $s$ and $\mu$ fixed | $6.17 \times 10^{12}$ | 199 | 18.3    | $> F(0.05, 1, 197)$ |
| $s$ varying, $t_1$ and $\mu$ fixed | $5.58 \times 10^{12}$ | 199 | 39.1    | $> F(0.05, 1, 197)$ |
| $\mu$ varying, $t_1$ and $s$ fixed | $6.31 \times 10^{12}$ | 199 | 6.3     | $> F(0.05, 1, 197)$ |
| <i>Désirée- BP3 against BP6</i>    |                       |     |         |                     |
| <i>Growth model</i>                |                       |     |         |                     |
| Common model                       | 5205059               | 227 |         |                     |
| Separate models                    | 4879495               | 225 |         |                     |
| $\rho$ varying and $t_0$ fixed     | 5009685               | 226 | 9.1     | $> F(0.05, 1, 225)$ |
| $t_0$ varying and $\rho$ fixed     | 5107757               | 226 | 4.5     | $> F(0.05, 1, 225)$ |
| <i>Sporulation model</i>           |                       |     |         |                     |
| Common model                       | $2.14 \times 10^{12}$ | 263 |         |                     |
| Separate models                    | $1.86 \times 10^{12}$ | 260 |         |                     |
| $t_1$ varying, $s$ and $\mu$ fixed | $2.03 \times 10^{12}$ | 262 | 16.6    | $> F(0.05, 1, 260)$ |
| $s$ varying, $t_1$ and $\mu$ fixed | $1.90 \times 10^{12}$ | 262 | 27.4    | $> F(0.05, 1, 260)$ |
| $\mu$ varying, $t_1$ and $s$ fixed | $2.06 \times 10^{12}$ | 262 | 8.0     | $> F(0.05, 1, 260)$ |
