# Supplementary material
Source: PubMed Central journal article supplement (PMC6790771)
Supplement: rspb20191244supp6.pdf [file rspb20191244supp6.pdf]

Table S-3: Comparison of models between cultivars for isolate BP3. Calculated F-values higher than the critical value,  $F(\text{significance level, degree of freedom of numerator, degree of freedom of denominator})$  indicate that the processes tested contribute to significant differences between the compared treatments. Separate-curve fits are compared with the single-curve fit.

| Models                              | RSS                   | df  | F-value |                     |
|-------------------------------------|-----------------------|-----|---------|---------------------|
| <i>BP3 - Bintje against Möwe</i>    |                       |     |         |                     |
| <i>Growth model</i>                 |                       |     |         |                     |
| Common model                        | 12342345              | 224 |         |                     |
| Separate models                     | 8129736               | 222 |         |                     |
| $\rho$ varying and $t_0$ fixed      | 8041872               | 223 | 117.4   | $> F(0.05, 1, 222)$ |
| $t_0$ varying and $\rho$ fixed      | 11634140              | 223 | 19.3    | $> F(0.05, 1, 222)$ |
| <i>Sporulation model</i>            |                       |     |         |                     |
| Common model                        | $9.31 \times 10^{12}$ | 223 |         |                     |
| Separate models                     | $6.99 \times 10^{12}$ | 220 |         |                     |
| $t_1$ varying, $s$ and $\mu$ fixed  | $7.50 \times 10^{12}$ | 222 | 57.2    | $> F(0.05, 1, 220)$ |
| $s$ varying, $t_1$ and $\mu$ fixed  | $7.95 \times 10^{12}$ | 222 | 42.9    | $> F(0.05, 1, 220)$ |
| $\mu$ varying, $t_1$ and $s$ fixed  | $8.59 \times 10^{12}$ | 222 | 22.8    | $> F(0.05, 1, 220)$ |
| <i>BP3 - Bintje against Désirée</i> |                       |     |         |                     |
| <i>Growth model</i>                 |                       |     |         |                     |
| Common model                        | 7404216               | 229 |         |                     |
| Separate models                     | 6350869               | 227 |         |                     |
| $\rho$ varying and $t_0$ fixed      | 6631727               | 228 | 27.6    | $> F(0.05, 1, 227)$ |
| $t_0$ varying and $\rho$ fixed      | 6295958               | 228 | 36.6    | $> F(0.05, 1, 227)$ |
| <i>Sporulation model</i>            |                       |     |         |                     |
| Common model                        | $7.32 \times 10^{12}$ | 228 |         |                     |
| Separate models                     | $5.24 \times 10^{12}$ | 225 |         |                     |
| $t_1$ varying, $s$ and $\mu$ fixed  | $6.68 \times 10^{12}$ | 227 | 27.7    | $> F(0.05, 1, 225)$ |
| $s$ varying, $t_1$ and $\mu$ fixed  | $5.29 \times 10^{12}$ | 227 | 87.4    | $> F(0.05, 1, 225)$ |
| $\mu$ varying, $t_1$ and $s$ fixed  | $6.79 \times 10^{12}$ | 227 | 22.7    | $> F(0.05, 1, 225)$ |
| <i>BP3 - Möwe against Désirée</i>   |                       |     |         |                     |
| <i>Growth model</i>                 |                       |     |         |                     |
| Common model                        | 12980376              | 201 |         |                     |
| Separate models                     | 7124301               | 199 |         |                     |
| $\rho$ varying and $t_0$ fixed      | 7594831               | 200 | 150.4   | $> F(0.05, 1, 199)$ |
| $t_0$ varying and $\rho$ fixed      | 8436374               | 200 | 126.9   | $> F(0.05, 1, 199)$ |
| <i>Sporulation model</i>            |                       |     |         |                     |
| Common model                        | $4.50 \times 10^{12}$ | 200 |         |                     |
| Separate models                     | $4.26 \times 10^{12}$ | 197 |         |                     |
| $t_1$ varying, $s$ and $\mu$ fixed  | $4.45 \times 10^{12}$ | 199 | 1.9     | <b>NS</b>           |
| $s$ varying, $t_1$ and $\mu$ fixed  | $4.38 \times 10^{12}$ | 199 | 5.2     | $> F(0.05, 1, 197)$ |
| $\mu$ varying, $t_1$ and $s$ fixed  | $4.46 \times 10^{12}$ | 199 | 1.4     | <b>NS</b>           |
