# Supplementary material
Source: PubMed Central journal article supplement (PMC6790771)
Supplement: rspb20191244supp7.pdf [file rspb20191244supp7.pdf]

Table S-4: Comparison of models between cultivars for isolate BP6. Calculated F-values higher than the critical value,  $F(\text{significance level, degree of freedom of numerator, degree of freedom of denominator})$  indicate that the processes tested contribute to significant differences between the compared treatments. Separate-curve fits are compared with the single-curve fit.

| Models                              | RSS                   | df  | F-value |                     |
|-------------------------------------|-----------------------|-----|---------|---------------------|
| <i>BP6 - Bintje against Möwe</i>    |                       |     |         |                     |
| <i>Growth model</i>                 |                       |     |         |                     |
| Common model                        | 4970014               | 241 |         |                     |
| Separate models                     | 2647792               | 239 |         |                     |
| $\rho$ varying and $t_0$ fixed      | 2669982               | 240 | 207.6   | $> F(0.05, 1, 239)$ |
| $t_0$ varying and $\rho$ fixed      | 3566505               | 240 | 126.7   | $> F(0.05, 1, 239)$ |
| <i>Sporulation model</i>            |                       |     |         |                     |
| Common model                        | $5.04 \times 10^{12}$ | 240 |         |                     |
| Separate models                     | $3.91 \times 10^{12}$ | 237 |         |                     |
| $t_1$ varying, $s$ and $\mu$ fixed  | $4.38 \times 10^{12}$ | 239 | 38.9    | $> F(0.05, 1, 237)$ |
| $s$ varying, $t_1$ and $\mu$ fixed  | $4.28 \times 10^{12}$ | 239 | 45.9    | $> F(0.05, 1, 237)$ |
| $\mu$ varying, $t_1$ and $s$ fixed  | $4.75 \times 10^{12}$ | 239 | 17.2    | $> F(0.05, 1, 237)$ |
| <i>BP6 - Bintje against Désirée</i> |                       |     |         |                     |
| <i>Growth model</i>                 |                       |     |         |                     |
| Common model                        | 4408200               | 262 |         |                     |
| Separate models                     | 3490775               | 260 |         |                     |
| $\rho$ varying and $t_0$ fixed      | 4198880               | 261 | 7.9     | $> F(0.05, 1, 260)$ |
| $t_0$ varying and $\rho$ fixed      | 4377887               | 261 | 1.3     | <b>NS</b>           |
| <i>Sporulation model</i>            |                       |     |         |                     |
| Common model                        | $2.72 \times 10^{12}$ | 261 |         |                     |
| Separate models                     | $1.99 \times 10^{12}$ | 258 |         |                     |
| $t_1$ varying, $s$ and $\mu$ fixed  | $2.32 \times 10^{12}$ | 260 | 51.7    | $> F(0.05, 1, 258)$ |
| $s$ varying, $t_1$ and $\mu$ fixed  | $2.02 \times 10^{12}$ | 260 | 91.8    | $> F(0.05, 1, 258)$ |
| $\mu$ varying, $t_1$ and $s$ fixed  | $2.55 \times 10^{12}$ | 260 | 22.5    | $> F(0.05, 1, 258)$ |
| <i>BP6 - Möwe against Désirée</i>   |                       |     |         |                     |
| <i>Growth model</i>                 |                       |     |         |                     |
| Common model                        | 4945656               | 227 |         |                     |
| Separate models                     | 3570573               | 225 |         |                     |
| $\rho$ varying and $t_0$ fixed      | 4295492               | 226 | 20.5    | $> F(0.05, 1, 225)$ |
| $t_0$ varying and $\rho$ fixed      | 3849033               | 226 | 34.6    | $> F(0.05, 1, 225)$ |
| <i>Sporulation model</i>            |                       |     |         |                     |
| Common model                        | $3.21 \times 10^{12}$ | 226 |         |                     |
| Separate models                     | $3.13 \times 10^{12}$ | 223 |         |                     |
| $t_1$ varying, $s$ and $\mu$ fixed  | $3.17 \times 10^{12}$ | 225 | 2.5     | <b>NS</b>           |
| $s$ varying, $t_1$ and $\mu$ fixed  | $3.20 \times 10^{12}$ | 225 | 0.2     | <b>NS</b>           |
| $\mu$ varying, $t_1$ and $s$ fixed  | $3.15 \times 10^{12}$ | 225 | 3.7     | <b>NS</b>           |
