# Supplementary material
Source: PubMed Central journal article supplement (PMC6790771)

BP6

BP3

Bintje

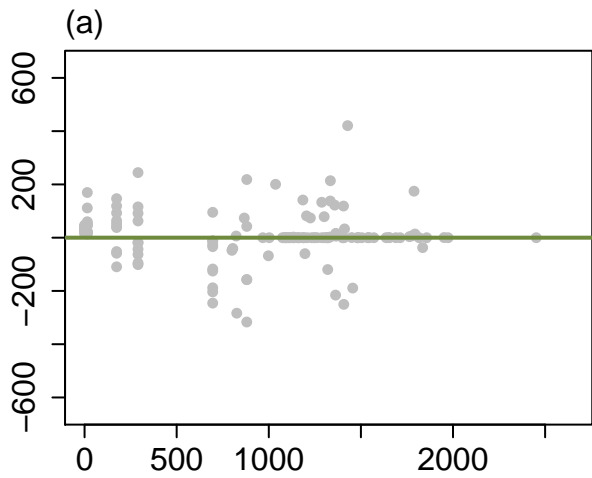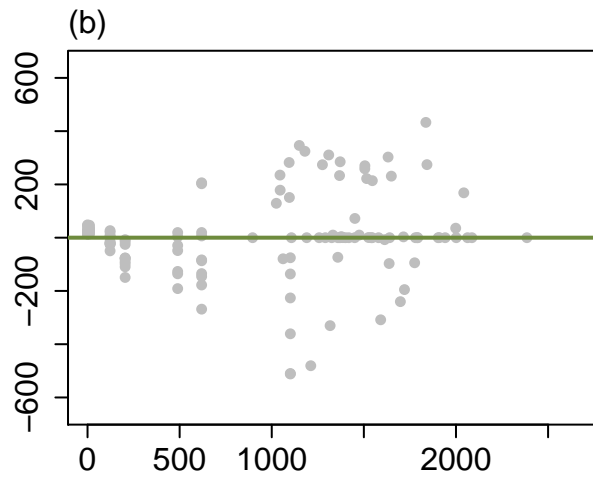

Möwe

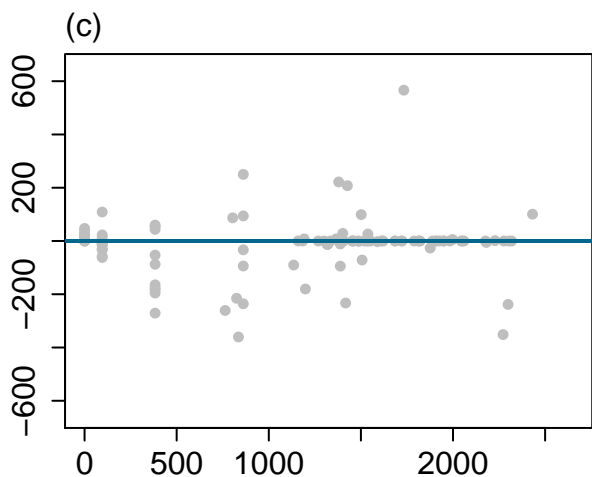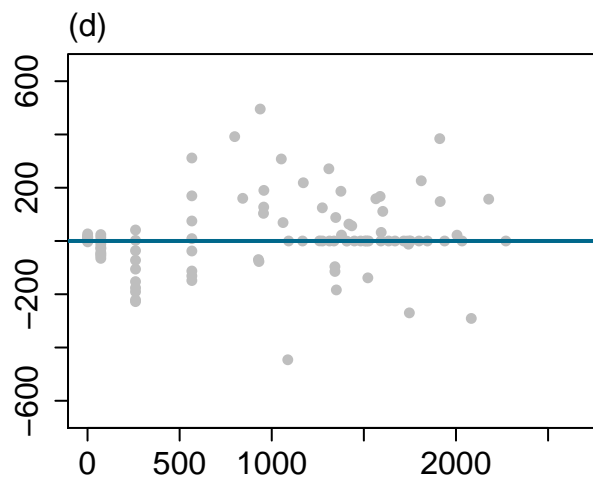

Désirée

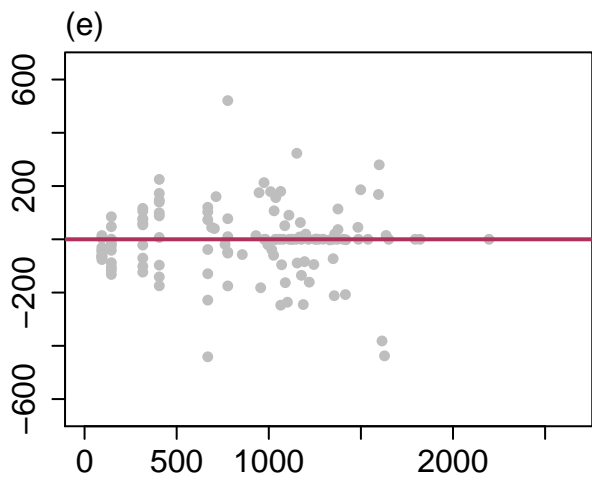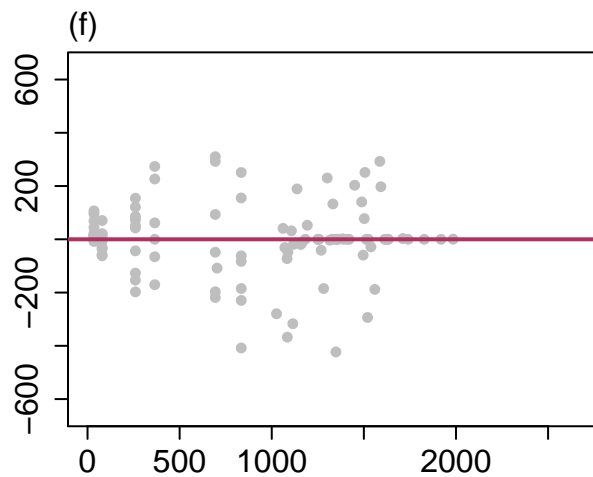

Fitted values

Supplement: rspb20191244supp1.pdf [file rspb20191244supp1.pdf]

BP6

BP3

Bintje

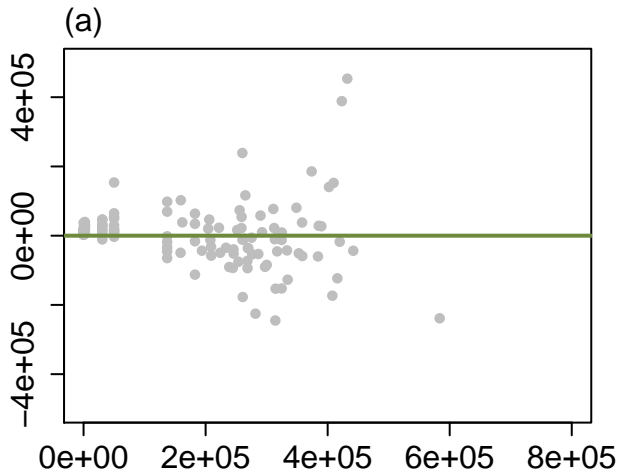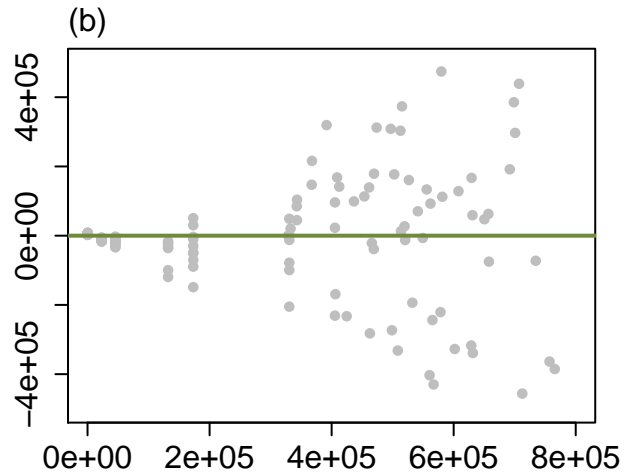

Möwe

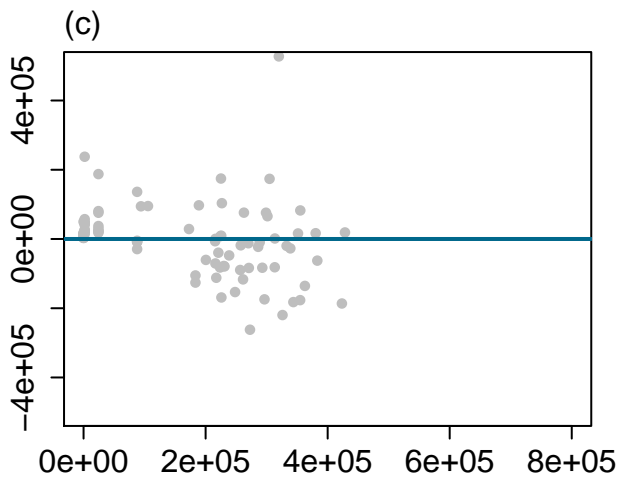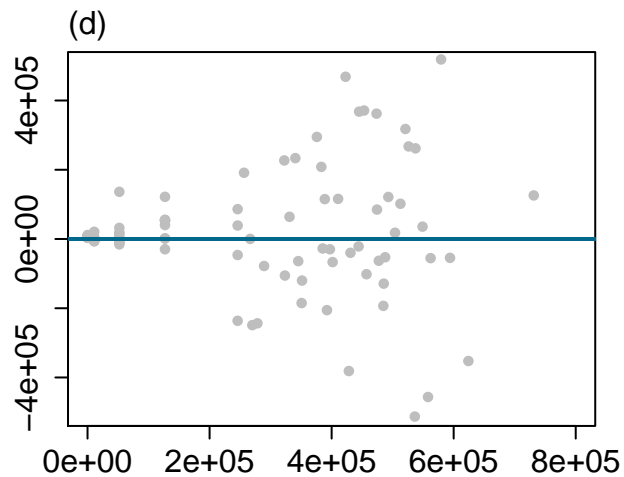

Désirée

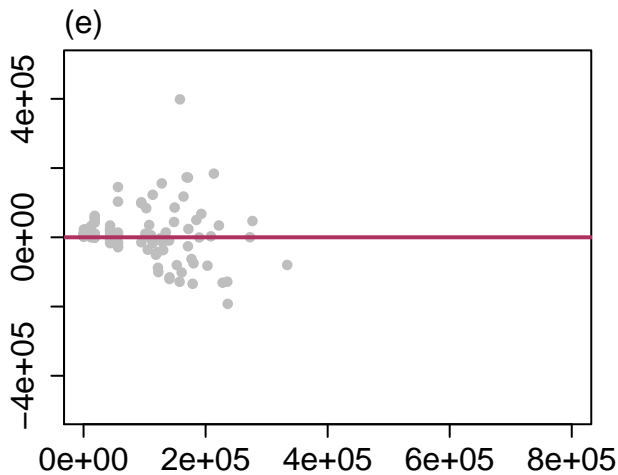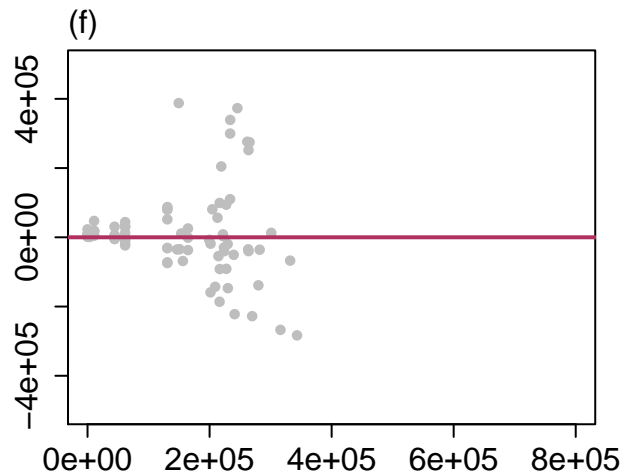

Fitted values

Supplement: rspb20191244supp2.pdf [file rspb20191244supp2.pdf]
